# Supplementary material for: A comprehensive in silico investigation into the nsSNPs of Drd2 gene predicts significant functional consequences in dopamine signaling and pharmacotherapy
Source: PubMed Central journal article supplement (PMC8636637; doi:10.1038/s41598-021-02715-z), 2021-12-01
Supplement: 41598_2021_2715_MOESM1_ESM.pdf [file 41598_2021_2715_MOESM1_ESM.pdf]

**Supplementary Table S1.** Distribution of STK11 intron, missense, coding synonymous, non-coding transcript variant and intron, 3'UTR, and 5'UTR SNPs.

| SNP               | Amount         |
|-------------------|----------------|
| Intron            | 15370 (93.40%) |
| Missense          | 238 (1.45%)    |
| Synonymous        | 173 (1.05%)    |
| Non-coding        | 139 (0.84%)    |
| In-frame deletion | 2 (0.01%)      |
| Total             | 16456          |

**Supplementary Table S2.** Unanimous deleterious or damaging missense SNPs in the DRD2 protein predicted by 8 different tools.

| nsSNP ID     | Amino Acid Substitution | SIFT Score | PROVEAN Score | Polyphen 2 probability | SNAP 2 Score | PANTHER-PSEP preservation time | P-Mut Score | SNPs & GO probability | PhD-SNP score |
|--------------|-------------------------|------------|---------------|------------------------|--------------|--------------------------------|-------------|-----------------------|---------------|
| rs752405585  | Y37C                    | 0          | -4.11         | 1                      | 40           | 750                            | 0.8674      | 0.799                 | 0.664         |
| rs868401982  | E62K                    | 0          | -3.15         | 1                      | 82           | 1037                           | 0.7875      | 0.578                 | 0.642         |
| rs1053323059 | V74F                    | 0.001      | -4.63         | 1                      | 44           | 750                            | 0.5014      | 0.75                  | 0.844         |
| rs753530257  | A77T                    | 0          | -3.72         | 1                      | 79           | 1037                           | 0.9043      | 0.726                 | 0.83          |
| rs199961459  | A84T                    | 0.001      | -3.64         | 1                      | 52           | 750                            | 0.8055      | 0.627                 | 0.595         |
| rs1274176960 | T119M                   | 0          | -5.7          | 1                      | 84           | 1037                           | 0.9179      | 0.736                 | 0.855         |
| rs148478679  | C126W                   | 0          | -9.08         | 0.999                  | 89           | 1037                           | 0.9345      | 0.871                 | 0.949         |
| rs549053606  | D131N                   | 0.004      | -4.74         | 0.958                  | 80           | 1037                           | 0.9305      | 0.75                  | 0.862         |
| rs779267865  | R145C                   | 0.008      | -4.27         | 0.999                  | 78           | 750                            | 0.7467      | 0.777                 | 0.862         |
| rs199517364  | R150H                   | 0.001      | -4.47         | 1                      | 35           | 750                            | 0.7933      | 0.683                 | 0.798         |
| rs754343100  | R150C                   | 0          | -6.86         | 1                      | 49           | 750                            | 0.7057      | 0.761                 | 0.874         |
| rs773041317  | G173R                   | 0.005      | -7.61         | 1                      | 83           | 1037                           | 0.867       | 0.803                 | 0.879         |
| rs987305741  | R219C                   | 0          | -5.58         | 1                      | 64           | 750                            | 0.9345      | 0.638                 | 0.779         |
| rs890174542  | E368D                   | 0.002      | -2.72         | 1                      | 48           | 1037                           | 0.6824      | 0.722                 | 0.639         |
| rs763380657  | F389V                   | 0          | -5.81         | 1                      | 74           | 1037                           | 0.9345      | 0.729                 | 0.889         |
| rs773693505  | C399R                   | 0.001      | -6.24         | 1                      | 11           | 1037                           | 0.9179      | 0.855                 | 0.925         |
| rs748707296  | P404R                   | 0.005      | -3.03         | 0.996                  | 14           | 750                            | 0.8497      | 0.516                 | 0.8           |
| rs140938110  | C443F                   | 0          | -6.13         | 1                      | 71           | 1036                           | 0.8657      | 0.727                 | 0.715         |

**Supplementary Table S3.** Structural impact prediction of DRD2 high-risk pathogenic nsSNPs of DRD2 protein.

| Amino Acid Substitution    |        | Y37C          | E62K                | V74F          | A77T          | A84T          | T119M         | C126W                                                                                                        | D131N              | R145C                                                                                                        |
|----------------------------|--------|---------------|---------------------|---------------|---------------|---------------|---------------|--------------------------------------------------------------------------------------------------------------|--------------------|--------------------------------------------------------------------------------------------------------------|
| Mutpred prediction         |        | Benign        | Pathogenic          | Pathogenic    | Pathogenic    | Pathogenic    | Pathogenic    | Pathogenic                                                                                                   | Pathogenic         | Pathogenic                                                                                                   |
| Mupro stability prediction |        | Decrease      | Decrease            | Decrease      | Decrease      | Decrease      | Increase      | Decrease                                                                                                     | Decrease           | Decrease                                                                                                     |
| NetSurfP prediction        | native | Buried        | Exposed             | Buried        | Buried        | Exposed       | Buried        | Buried                                                                                                       | Buried             | Exposed                                                                                                      |
|                            | mutant | Buried        | Exposed             | Buried        | Buried        | Buried        | Buried        | Buried                                                                                                       | Buried             | Exposed                                                                                                      |
| mCSM Prediction            |        | Destabilizing | Destabilizing       | Destabilizing | Destabilizing | Destabilizing | Destabilizing | Destabilizing                                                                                                | Destabilizing      | Destabilizing                                                                                                |
| SDM prediction             |        | Stabilizing   | Stabilizing         | Destabilizing | Destabilizing | Destabilizing | Stabilizing   | Stabilizing                                                                                                  | Destabilizing      | Destabilizing                                                                                                |
| DUET prediction            |        | Destabilizing | Stabilizing         | Destabilizing | Destabilizing | Destabilizing | Stabilizing   | Destabilizing                                                                                                | Destabilizing      | Destabilizing                                                                                                |
| Change in size             |        | Decrease      | Increase            | Increase      | Increase      | Increase      | Increase      | Increase                                                                                                     | Unchanged          | Decrease                                                                                                     |
| Change of charge           |        | Unchanged     | Negative > Positive | Unchanged     | Unchanged     | Unchanged     | Unchanged     | Unchanged                                                                                                    | Negative > Neutral | Positive > Neutral                                                                                           |
| Change in hydrophobicity   |        | Increase      | Unchanged           | Unchanged     | Loss          | Loss          | Increase      | Unchanged                                                                                                    | Unchanged          | Increase                                                                                                     |
| Other impacts              |        | None          | None                | None          | None          | None          | None          | The residue being involved in a cysteine bridge, the mutation will have a severe effect on the 3D-structure. | None               | The residue being involved in a cysteine bridge, the mutation will have a severe effect on the 3D-structure. |

**Supplementary Table S3.** Structural impact prediction of DRD2 high-risk pathogenic nsSNPs of DRD2 protein. (continued)

| <b>Amino Acid Substitution</b> | <b>R150H</b>       | <b>R150C</b>                                                                                                 | <b>G173R</b>                                                                                                                                                                   | <b>R219C</b>                                                               | <b>E368D</b>                                                                                                                                         | <b>F389V</b>                                                                                                                                     | <b>C399R</b>                                                                                                 | <b>P404R</b>                                                                                      | <b>C443F</b>  |
|--------------------------------|--------------------|--------------------------------------------------------------------------------------------------------------|--------------------------------------------------------------------------------------------------------------------------------------------------------------------------------|----------------------------------------------------------------------------|------------------------------------------------------------------------------------------------------------------------------------------------------|--------------------------------------------------------------------------------------------------------------------------------------------------|--------------------------------------------------------------------------------------------------------------|---------------------------------------------------------------------------------------------------|---------------|
| Mutpred score                  | Pathogenic         | Pathogenic                                                                                                   | Pathogenic                                                                                                                                                                     | Pathogenic                                                                 | Pathogenic                                                                                                                                           | Pathogenic                                                                                                                                       | Pathogenic                                                                                                   | Pathogenic                                                                                        | Pathogenic    |
| Mupro stability prediction     | Decrease           | Decrease                                                                                                     | Decrease                                                                                                                                                                       | Decrease                                                                   | Decrease                                                                                                                                             | Decrease                                                                                                                                         | Decrease                                                                                                     | Decrease                                                                                          | Increase      |
| NetSurfP prediction            | native             | Exposed                                                                                                      | Exposed                                                                                                                                                                        | Exposed                                                                    | Exposed                                                                                                                                              | Exposed                                                                                                                                          | Buried                                                                                                       | Exposed                                                                                           | Exposed       |
|                                | mutant             | Exposed                                                                                                      | Exposed                                                                                                                                                                        | Exposed                                                                    | Buried                                                                                                                                               | Exposed                                                                                                                                          | Exposed                                                                                                      | Exposed                                                                                           | Exposed       |
| mCSM Prediction                | Destabilizing      | Destabilizing                                                                                                | Destabilizing                                                                                                                                                                  | Destabilizing                                                              | Destabilizing                                                                                                                                        | Destabilizing                                                                                                                                    | Stabilizing                                                                                                  | Destabilizing                                                                                     | Destabilizing |
| SDM prediction                 | Destabilizing      | Destabilizing                                                                                                | Destabilizing                                                                                                                                                                  | Destabilizing                                                              | Destabilizing                                                                                                                                        | Stabilizing                                                                                                                                      | Stabilizing                                                                                                  | Destabilizing                                                                                     | Stabilizing   |
| DUET prediction                | Destabilizing      | Destabilizing                                                                                                | Destabilizing                                                                                                                                                                  | Destabilizing                                                              | Destabilizing                                                                                                                                        | Destabilizing                                                                                                                                    | Stabilizing                                                                                                  | Stabilizing                                                                                       | Destabilizing |
| Change in size                 | Decrease           | Decrease                                                                                                     | Increase                                                                                                                                                                       | Decrease                                                                   | Decrease                                                                                                                                             | Decrease                                                                                                                                         | Increase                                                                                                     | Increase                                                                                          | Increase      |
| Change of charge               | Positive > Neutral | Positive > Neutral                                                                                           | Neutral > Positive                                                                                                                                                             | Positive > Neutral                                                         | Unchanged                                                                                                                                            | Unchanged                                                                                                                                        | Positive > Neutral                                                                                           | Neutral > Positive                                                                                | Unchanged     |
| Change in hydrophobicity       |                    | Increase                                                                                                     | Increase                                                                                                                                                                       | Increase                                                                   | Unchanged                                                                                                                                            | Unchanged                                                                                                                                        | Decrease                                                                                                     | Decrease                                                                                          | Unchanged     |
| Other impacts                  | None               | The residue being involved in a cysteine bridge, the mutation will have a severe effect on the 3D-structure. | Exclusively the native glycine forms an unusual torsion angle. The mutation will force the local backbone into an incorrect conformation and will disturb the local structure. | The mutation will disturb interaction with secondary messenger Neurabin 2. | The wild-type forms a H bond with Gln 368 and a salt bridge with Lys 369. The mutation will disturb interaction with secondary messenger Neurabin 2. | The mutation being located within the agonist binding region, the resulting empty space in the core can disturb the functionality of the protein | The residue being involved in a cysteine bridge, the mutation will have a severe effect on the 3D-structure. | The mutation can disturb the special backbone conformation induced by the native proline residue. | None          |

**Supplementary Table S4.** Evolutionary conservation prediction of DRD2 protein using ConSurf and HOPE server

| <b>Residue and Position</b> | <b>Conservation score</b> | <b>Prediction</b>                | <b>HOPE conservation prediction</b> |
|-----------------------------|---------------------------|----------------------------------|-------------------------------------|
| C126                        | 9                         | Highly conserved and buried (s)  | Very conserved                      |
| R145                        | 8                         | Very conserved and exposed (f)   | Very conserved                      |
| R150                        | 9                         | Highly conserved and exposed (f) | Very conserved                      |
| G173                        | 9                         | Highly conserved and buried (s)  | Very conserved                      |
| R219                        | 9                         | Highly conserved and exposed (f) | Very conserved                      |
| E368                        | 9                         | Highly conserved and exposed (f) | Very conserved                      |
| F389                        | 9                         | Highly conserved and buried (s)  | 100% conserved                      |
| C399                        | 9                         | Highly conserved and buried (s)  | Very conserved                      |
| P404                        | 7                         | Conserved and exposed            | Not very conserved                  |

**Supplementary Table S5.** Protein model verification by PROCHECK and ERRAT.

| Mutation  | Quality Parameters                    |                                            |                                            |                                    |                      |
|-----------|---------------------------------------|--------------------------------------------|--------------------------------------------|------------------------------------|----------------------|
|           | PROCHECK Ramachandran plot            |                                            |                                            |                                    | ERRAT quality factor |
|           | Residues in most favoured regions (%) | Residues in additional allowed regions (%) | Residues in generously allowed regions (%) | Residues in disallowed regions (%) |                      |
| Wild type | 91.1                                  | 6.7                                        | 1.1                                        | 1.1                                | 78.7958              |
| C126W     | 91.1                                  | 8.1                                        | 0                                          | 0.8                                | 91.4787              |
| R145C     | 90.1                                  | 9.1                                        | 0.3                                        | 0.5                                | 84.6939              |
| R150C     | 91.1                                  | 7.8                                        | 0.3                                        | 0.8                                | 91.2281              |
| G173R     | 89.8                                  | 7.8                                        | 1.6                                        | 0.8                                | 94.7917              |
| R219C     | 90.1                                  | 9.1                                        | 0.3                                        | 0.5                                | 84.6939              |
| E368D     | 90.3                                  | 7.5                                        | 1.1                                        | 1.1                                | 88.2199              |
| F389V     | 90.3                                  | 7.5                                        | 0.8                                        | 1.3                                | 81.4136              |
| C399R     | 90.3                                  | 8.6                                        | 0.3                                        | 0.8                                | 86.9674              |

**Supplementary Table S6.** Interatomic interaction prediction of native DRD2 and mutant proteins.

| Mutation | $\Delta\Delta G$<br>ENCoM | $\Delta\Delta S$<br>ENCoM | $\Delta\Delta G$<br>DynaMut |
|----------|---------------------------|---------------------------|-----------------------------|
| C126W    | 0.55                      | -0.688                    | 1.229                       |
| R145C    | -0.174                    | 0.218                     | -0.512                      |
| R150C    | 0.403                     | -0.504                    | 0.412                       |
| R219C    | -0.34                     | 0.425                     | -0.621                      |
| E368D    | -0.267                    | 0.334                     | -0.838                      |
| F389V    | -0.655                    | 0.819                     | -0.206                      |
| C399R    | -0.501                    | 0.626                     | 0.054                       |

**Supplementary Table S7.** Binding affinity (kcal/mol) prediction of ligands with native and mutant using PyRx.

| <b>Ligand</b> | <b>Binding affinity (kcal/mol)</b> |                       |
|---------------|------------------------------------|-----------------------|
|               | <b>Wild type</b>                   | <b>Mutant (F389V)</b> |
| Dopamine      | -5.8                               | -5.4                  |
| Risperidone   | -8.5                               | -8.9                  |
